# Supplementary material
Source: MDPI journal article supplement (https://www.mdpi.com/2073-4441/15/2/325)
Supplement: s1 [file s1]

# Past and present environmental factors differentially influence genetic and morphological traits of Italian barbels (Pisces: Cyprinidae)

Silvia Quadroni <sup>1, ¶\*</sup>, Vanessa De Santis <sup>2, ¶\*</sup>, Antonella Carosi <sup>3</sup>, Isabella Vanetti <sup>1</sup>, Serena Zaccara <sup>1</sup> and Massimo Lorenzoni <sup>3</sup>

<sup>1</sup> Department of Theoretical and Applied Sciences, University of Insubria, Varese, Italy; [silvia.quadroni@uninsubria.it](mailto:silvia.quadroni@uninsubria.it), [isabella.vanetti@uninsubria.it](mailto:isabella.vanetti@uninsubria.it), [serena.zaccara@uninsubria.it](mailto:serena.zaccara@uninsubria.it)

<sup>2</sup> CNR Water Research Institute, Verbania, Italy; [vanessa.desantis@irsa.cnr.it](mailto:vanessa.desantis@irsa.cnr.it)

<sup>3</sup> Department of Chemistry, Biology and Biotechnologies, University of Perugia, Perugia, Italy; [antonella.carosi@unipg.it](mailto:antonella.carosi@unipg.it), [massimo.lorenzoni@unipg.it](mailto:massimo.lorenzoni@unipg.it)

\* Correspondence: [silvia.quadroni@uninsubria.it](mailto:silvia.quadroni@uninsubria.it) (S.Q.), [vanessa.desantis@irsa.cnr.it](mailto:vanessa.desantis@irsa.cnr.it) (V.D.S.)

¶ These authors contributed equally to this work

## SUPPLEMENTARY MATERIAL

**Table SM1.** List and brief description of the environmental variables considered in this study.

|               | Variable                                                                       | Description                                                                                                                                                                                                                                                                                                                                                                     |
|---------------|--------------------------------------------------------------------------------|---------------------------------------------------------------------------------------------------------------------------------------------------------------------------------------------------------------------------------------------------------------------------------------------------------------------------------------------------------------------------------|
| Sampling site | Latitude                                                                       | -                                                                                                                                                                                                                                                                                                                                                                               |
|               | Longitude                                                                      | -                                                                                                                                                                                                                                                                                                                                                                               |
|               | Elevation                                                                      | -                                                                                                                                                                                                                                                                                                                                                                               |
|               | Distance from headwater                                                        | -                                                                                                                                                                                                                                                                                                                                                                               |
|               | Riverbed substrate                                                             | Percentage coverage of rocks, boulders, cobbles, large, medium and fine gravel, sand and silt/clay                                                                                                                                                                                                                                                                              |
|               | Mesohabitat                                                                    | Percentage coverage of cascades, large and small steps, rapids, riffles, pools and glides                                                                                                                                                                                                                                                                                       |
|               | Shading                                                                        | Percentage coverage of shaded water surface                                                                                                                                                                                                                                                                                                                                     |
|               | Plant cover                                                                    | Percentage of the bottom vegetation cover                                                                                                                                                                                                                                                                                                                                       |
|               | Presence of refuges                                                            | Percentage of cover for fishes, in terms of aquatic plants, boulders, submerged woody debris, undercut banks, etc.                                                                                                                                                                                                                                                              |
|               | Average depth                                                                  | Average depth of the wetted riverbed                                                                                                                                                                                                                                                                                                                                            |
|               | Average width                                                                  | Average width of the wetted riverbed                                                                                                                                                                                                                                                                                                                                            |
|               | LIMeco index                                                                   | Italian normative index based on the main chemical parameters (dissolved oxygen, ammonia and nitrate nitrogen, and total phosphorus) for the ecological status assessment of rivers <i>sensu</i> Water Framework Directive                                                                                                                                                      |
|               | STAR_ICMi index                                                                | Italian normative index based on benthic macroinvertebrates for the ecological status assessment of rivers <i>sensu</i> Water Framework Directive                                                                                                                                                                                                                               |
| River         | Total river length                                                             | -                                                                                                                                                                                                                                                                                                                                                                               |
|               | The quotient among average flow at the river outlet and total basin area (Q/A) | Indicator of the river hydrological regime                                                                                                                                                                                                                                                                                                                                      |
| Basin         | Geology                                                                        | Percentage coverage of i) alluvial and mixed rocks, ii) claystones, iii) limestones, iv) sandstones, v) chalky-solfifera and evaporitic sediments, vi) lakes and glaciers, vii) lavas, pyro-clasts and ignimbrites, viii) marlstones, ix) ophiolites and green stones, x) sands and conglomerates, xi) travertine, xii) flysch units and turbidites, and xiii) coarse sediments |
|               | Land Use                                                                       | Percentage coverage of woodland and seminatural land, wetland, cultivated land, and urbanized land                                                                                                                                                                                                                                                                              |
|               | Temperature                                                                    | Annual average, minimum and maximum air temperature, and average temperature of August (i.e., the warmest month)                                                                                                                                                                                                                                                                |
|               | Precipitation                                                                  | Annual precipitation and number of dry days                                                                                                                                                                                                                                                                                                                                     |

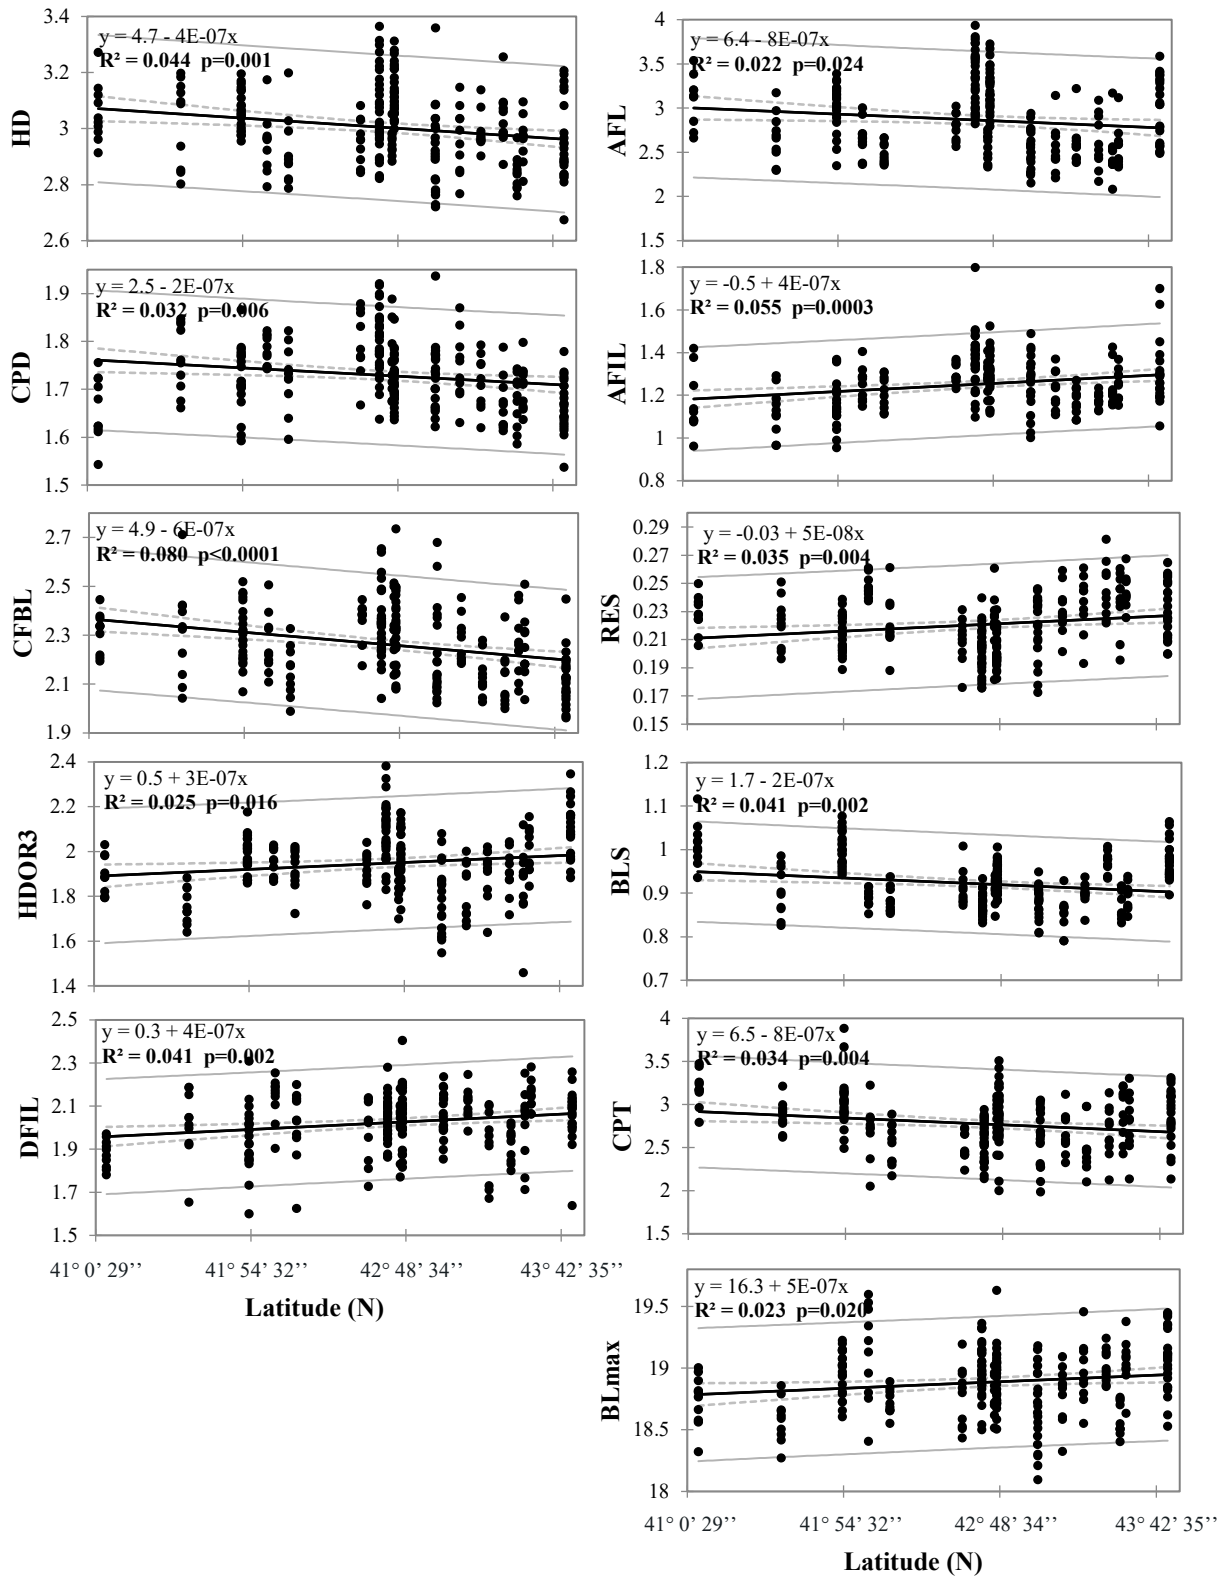

**Figure SM1.** Significant linear regressions of morphological and functional traits with latitude. HD = head depth, CPD = minimum caudal peduncle depth, CFBL = caudal fin base length, HDOR3 = height of the third dorsal fin branched ray, DFIL = dorsal fin insertion length, AFL = anal fin length, AFIL = anal fin insertion length, RES = relative eye size, BLS = body lateral shape, CPT = caudal peduncle throttling, BLmax = maximum body length.
